# Supplementary material for: Development and Evaluation of a Virtual Research Environment to Improve Quality of Care in Overcrowded Emergency Departments: Observational Study
Source: PubMed Central journal article supplement (PMC6705008; doi:10.2196/13993), 2019-08-08
Supplement: games_v7i3e13993_app1.pdf [file games_v7i3e13993_app1.pdf]

Entry

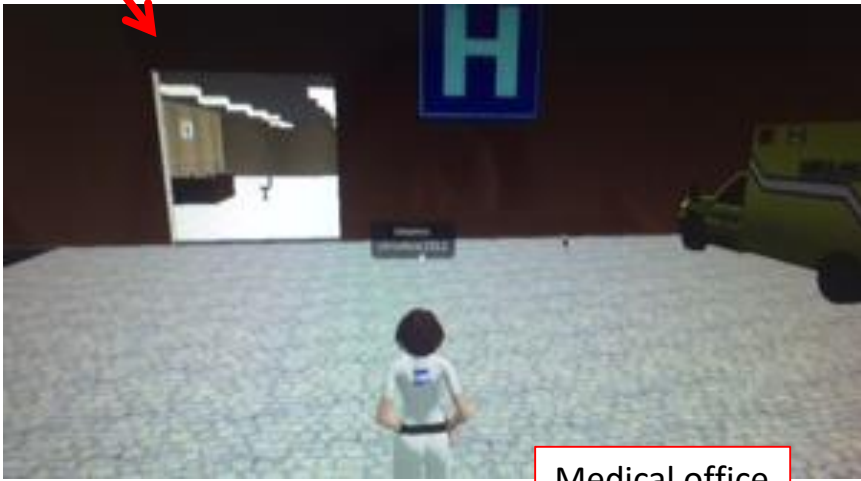

Nurse office

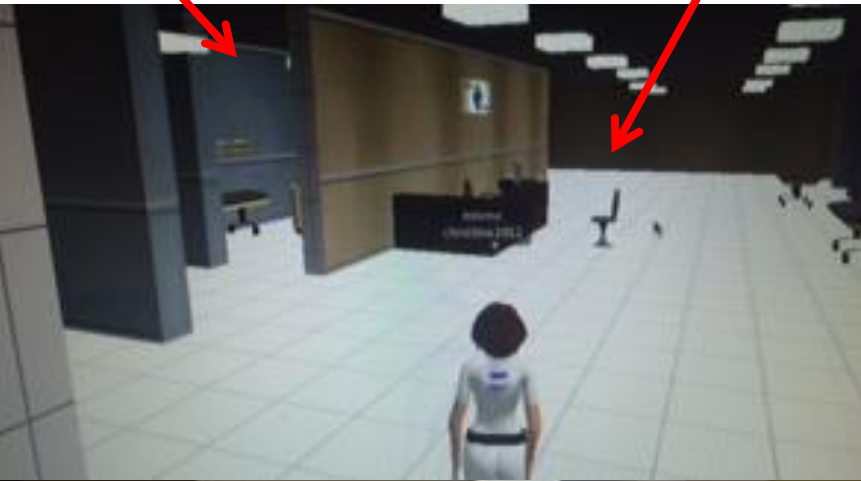

Administration

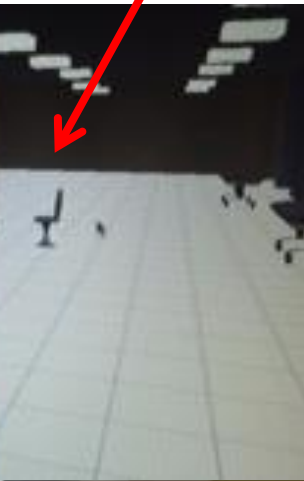

Medical office

Emergency Room

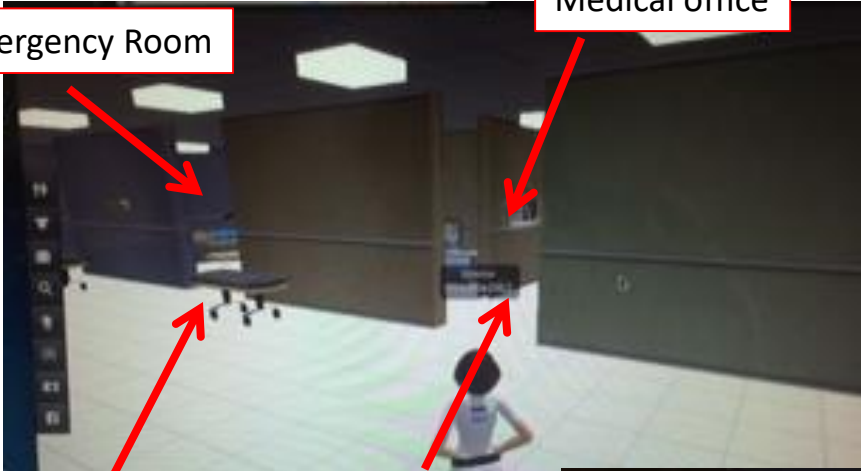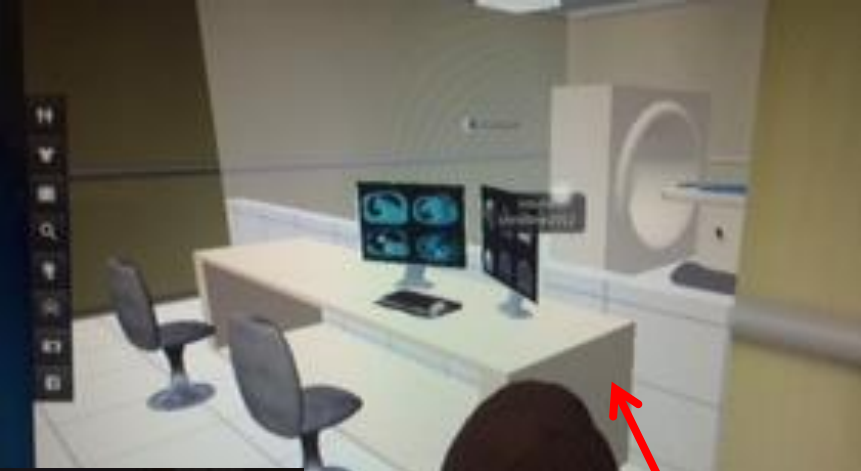

Hospitalisation sector

outpatient sector

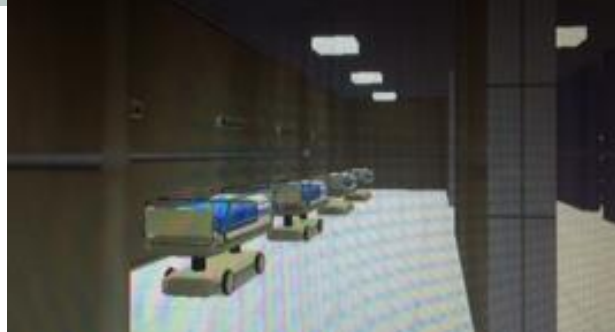

Radiology department
