# Supplementary material for: Development and Evaluation of a Virtual Research Environment to Improve Quality of Care in Overcrowded Emergency Departments: Observational Study
Source: PubMed Central journal article supplement (PMC6705008; doi:10.2196/13993), 2019-08-08
Supplement: games_v7i3e13993_app3.pdf [file games_v7i3e13993_app3.pdf]

Medical Office

Patient

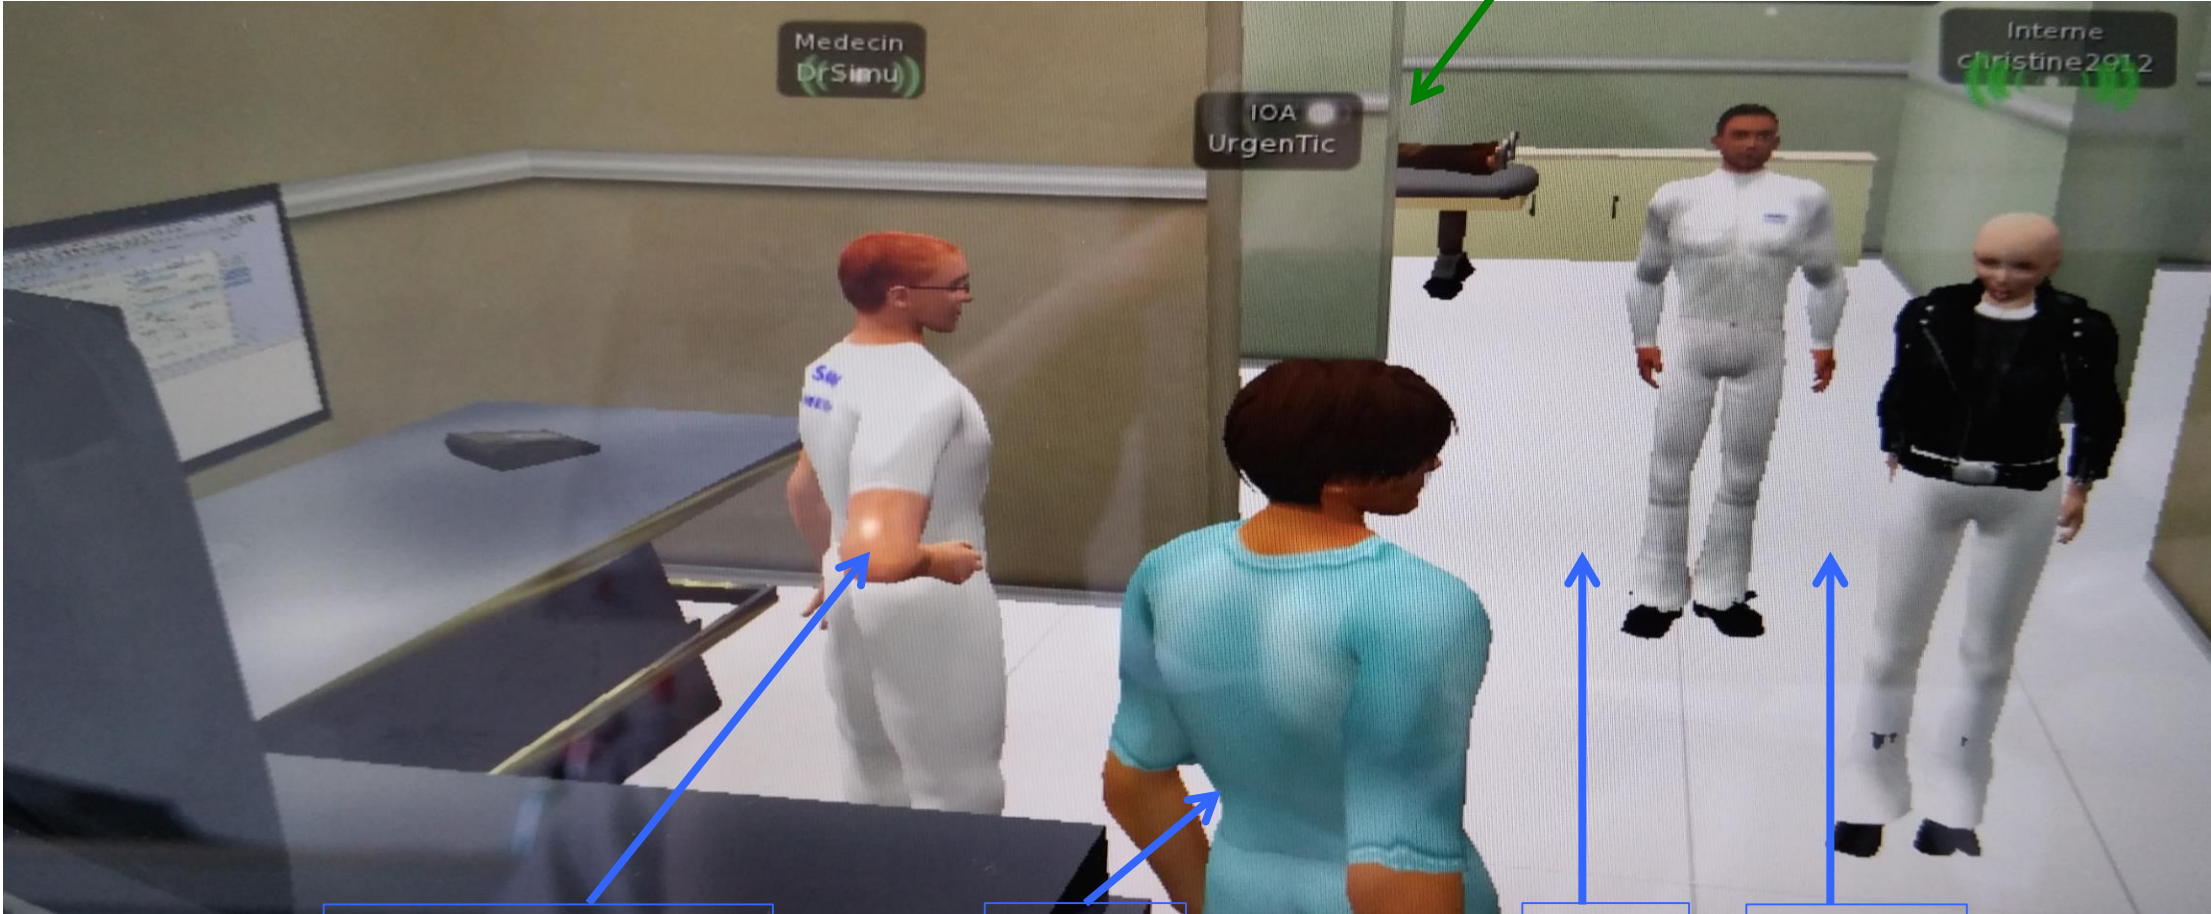

Emergency physician

Nurse

Nurse

Resident
